# Supplementary material for: Investigating the Effects of Conditioned Media from Stem Cells of Human Exfoliated Deciduous Teeth on Dental Pulp Stem Cells
Source: Biomedicines. 2022 Apr 15;10(4):906. doi: 10.3390/biomedicines10040906 (PMC9027398; doi:10.3390/biomedicines10040906)
Supplement: Supplementary file 1 [file biomedicines-10-00906-s001.zip › biomedicines-1669166-supplementary.pdf]

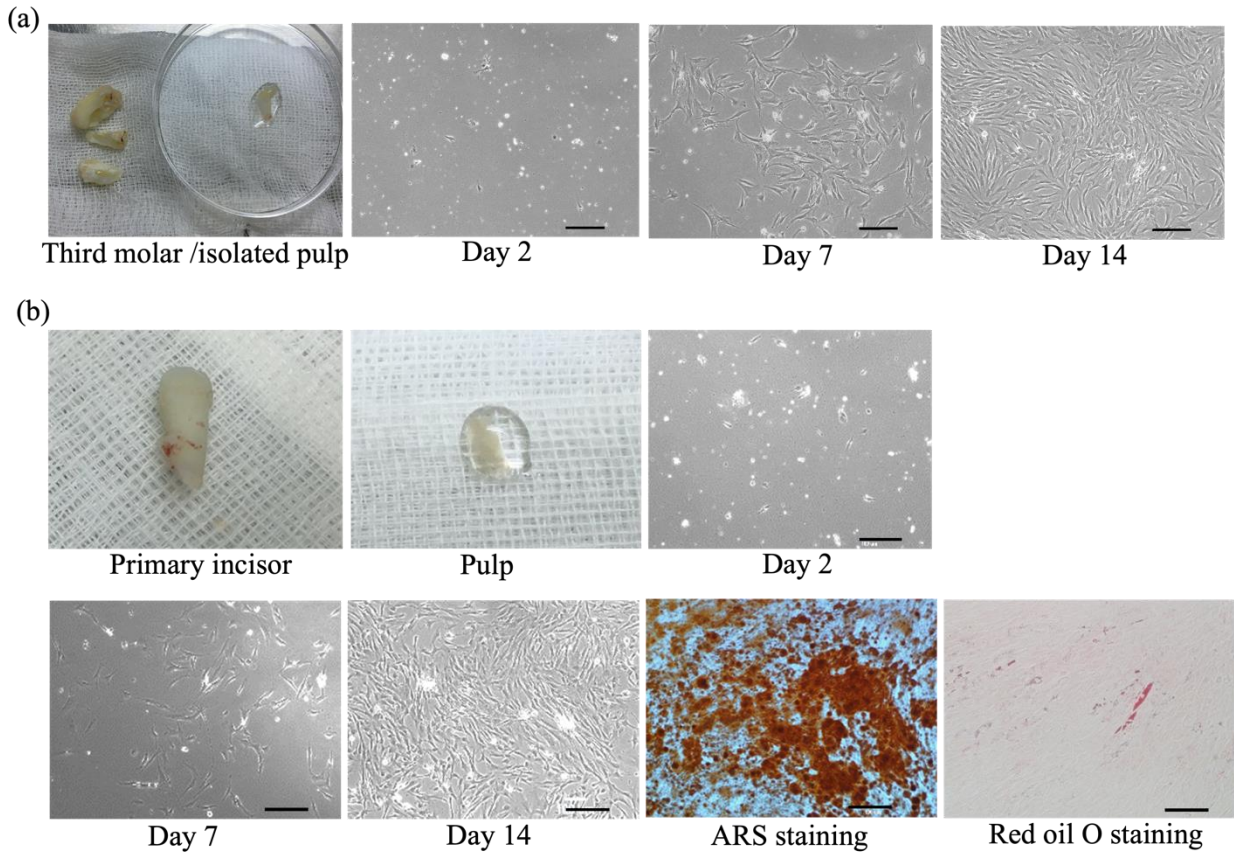

**Supplemental Figure S1.** (a) Primary culture of DPSCs. Cell adherence could be observed on the culture flask wall 16-24 hours after seeding, and clustered SHED was observed on Day 4 or 6. Most cells had a typical fibroblast-like appearance. (b) Primary culture of SHED and multiple lineage differentiation capacity of SHED was demonstrated by bone mineralization (ARS) and neutral lipid accumulation (oil Red O). Scale bar = 200  $\mu$ m.

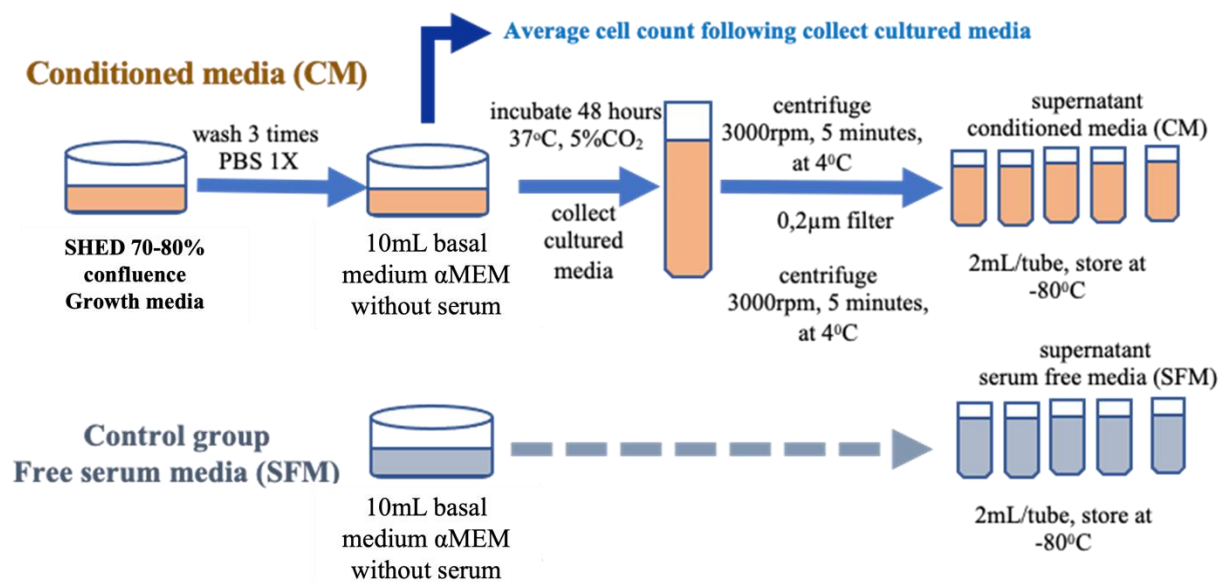

**Supplemental Figure S2. Illustration of SHED CM collection.** SHED passage #5 was cultured to 70%–

80% confluence and replenished with serum-free  $\alpha$ MEM. After 48 hours of incubation at 37 °C in 5% CO<sub>2</sub>, the conditioned medium (CM) was collected and centrifuged at 3000 rpm for 5 minutes at 4 °C to remove cell debris, and then the supernatant was passed through 0.2  $\mu$ m filters to obtain the final CM. Control-conditioned media was collected from serum-free  $\alpha$ MEM (SFM) and incubated for 48 hours under the same conditions as conditioned medium. The number of live cells was also calculated to ensure the cell viability was higher than 90%. All CM and SFM were subpackaged in 2 mL tubes and stored at -80 °C.

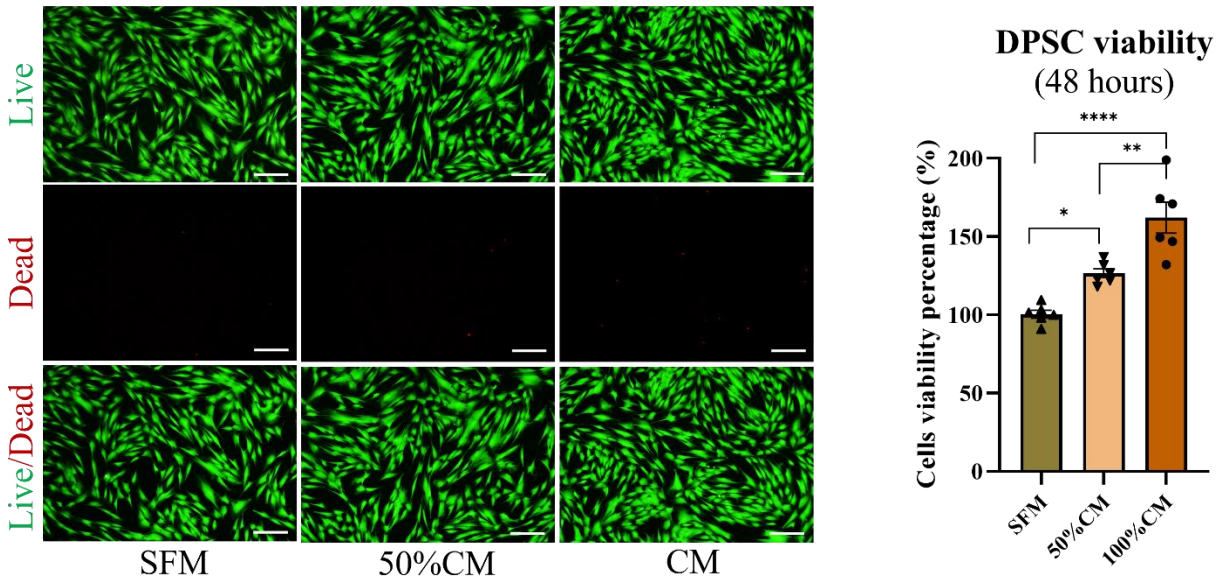

**Supplemental Figure S3. Effect of SHED CM on DPSC proliferation and migration.** (a) Presentative Live & Dead images of SHED 48 h after treatment with 100% CM versus 50% CM and SFM. The scale bar represents 200  $\mu$ m. (b) The effect of SHED CM after treatment for 48 h on the proliferation of DPSCs was quantified by CCK-8 assay. n=6

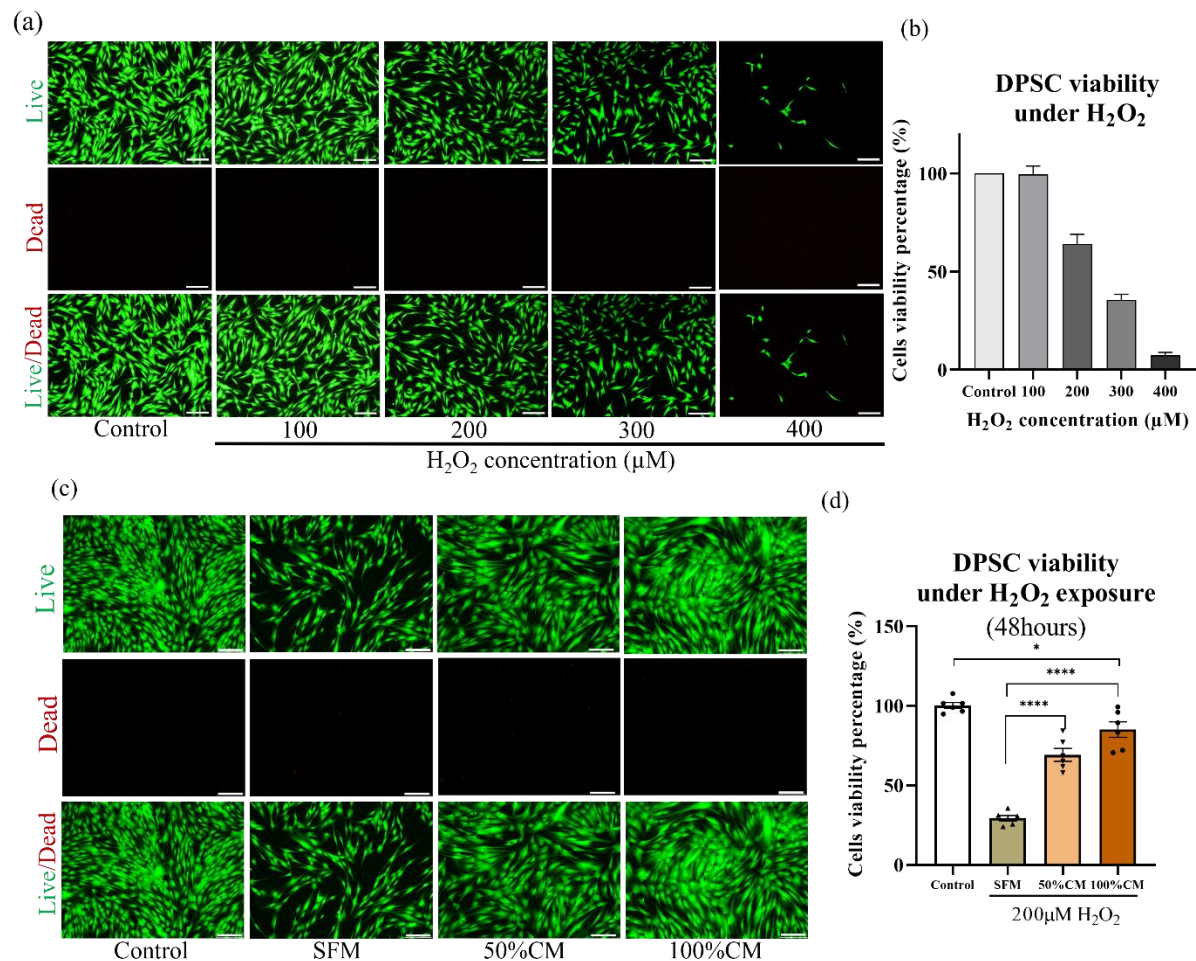

**Supplemental Figure S4.** (a) SHED exposure to different concentrations of  $H_2O_2$ . DPSCs were cultured with 100, 200, 300 and 400  $\mu M$   $H_2O_2$  for 12 hours. Representative live & dead images show the  $H_2O_2$  induced oxidative stress effect on SHED. Cell viability was determined by CCK-8 analysis. (b) DPSCs were cultured with 200  $\mu M$   $H_2O_2$  for 12 hours before shifting to CM, 50% CM and SFM for another 36 hours. Representative live & dead images of DPSCs. Cell viability was determined by CCK-8 analysis. All data are represented as the mean  $\pm$  SEM. The statistical significance was calculated using one-way analysis of variance (ANOVA) to compare groups. Represents \*\*\*\*  $p < 0.0001$ , ns=not significant, scale bar = 200  $\mu m$ .

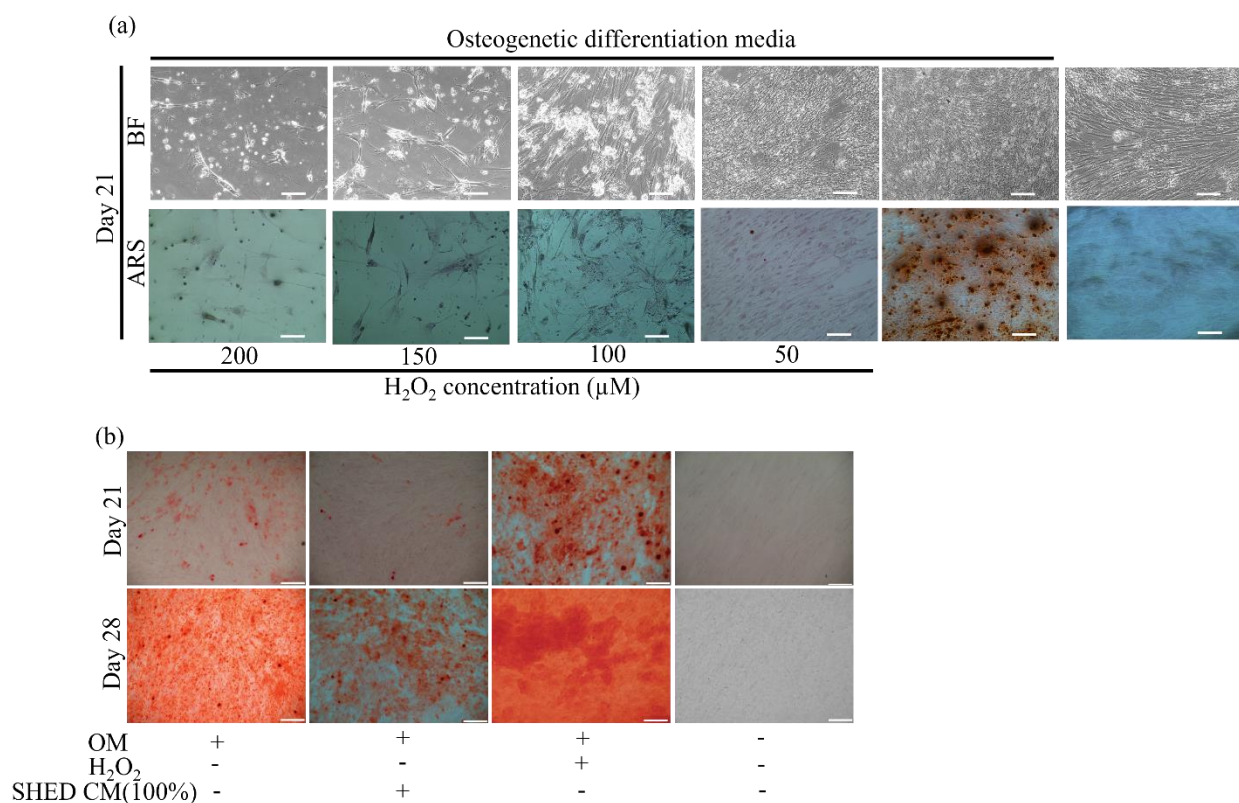

**Supplemental Figure S5.** (a) DPSC osteogenic differentiation after 24 hours of exposure to different H<sub>2</sub>O<sub>2</sub> concentrations, representative bright field images and ARS staining. (b) Treatment with 100% SHED CM enhanced DPSC osteogenic differentiation after exposure to 25 μM H<sub>2</sub>O<sub>2</sub> for 24 hours and ARS staining at Days 21 and 28. Scale bar = 200 μm.

**Supplemental Table S1. Biological functions of the top 50 cytokines in SHED CM** (Gene Ontology database)

| N  | Gene Symbol | Protein names                            | Biological functionals (DAVID annotation)                                  |
|----|-------------|------------------------------------------|----------------------------------------------------------------------------|
| 1  | ADIPOQ      | Adiponectin                              | Proliferation, survival                                                    |
| 2  | AKT2        | RAC-beta serine/threonine-protein kinase | Proliferation, migration                                                   |
| 3  | APC         | Adenomatous polyposis coli protein       | Migration                                                                  |
| 4  | ARTN        | Artemin                                  | Proliferation, survival                                                    |
| 5  | B2M         | Beta-2-microglobulin                     | Survival                                                                   |
| 6  | BMP4        | Bone morphogenetic protein 4             | Proliferation, survival, migration, odontoblast/osteogenic differentiation |
| 7  | BMP7        | Bone morphogenetic protein 7             | Odontoblast/osteogenic differentiation                                     |
| 8  | CCL11       | C-C motif chemokine 11                   | Survival, migration                                                        |
| 9  | CCL19       | C-C motif chemokine 19 chemokine         | Proliferation, survival, migration                                         |
| 10 | CCL2        | C-C motif chemokine 2 factor             | Proliferation, survival, migration                                         |
| 11 | CTNNA1      | Catenin alpha-1                          | Odontoblast/osteogenic differentiation                                     |
| 12 | CTNNB1      | Catenin beta-1                           | Odontoblast/osteogenic differentiation                                     |
| 13 | CXCL1       | Growth-regulated alpha protein           | Migration                                                                  |
| 14 | ERBB2       | Receptor tyrosine-protein kinase erbB-2  | Proliferation, survival, migration, odontoblast/osteogenic differentiation |

|    |          |                                                                  |                                                                            |
|----|----------|------------------------------------------------------------------|----------------------------------------------------------------------------|
| 15 | ERBB3    | Receptor tyrosine-protein kinase erbB-3                          | Proliferation, survival, migration, odontoblast/osteogenic differentiation |
| 16 | ERCC6    | DNA excision repair protein ERCC-6                               | Odontoblast/osteogenic differentiation                                     |
| 17 | FASLG    | Tumor necrosis factor ligand superfamily member 6                | Inflammation, apoptosis                                                    |
| 18 | FGF4     | Fibroblast growth Factor 4                                       | Proliferation, survival, odontoblast/osteogenic differentiation            |
| 19 | FGF5     | Fibroblast growth Factor 5                                       | Proliferation, survival, odontoblast/osteogenic differentiation            |
| 20 | HDAC9    | Histone deacetylase 9                                            | Inflammation, apoptosis                                                    |
| 21 | IGFBP7   | Insulin-like growth factor-binding protein 7                     | Proliferation, survival                                                    |
| 22 | IL2RA    | Interleukin-2 receptor subunit alpha                             | Proliferation, survival                                                    |
| 23 | ITGB5    | Integrin beta-5                                                  | Proliferation                                                              |
| 24 | LGALS3   | Galectin-3                                                       | Migration                                                                  |
| 25 | MDK      | Midkine                                                          | Proliferation, migration                                                   |
| 26 | MMP1     | Matrix metalloproteinase 1                                       | Proliferation                                                              |
| 27 | MMP10    | Matrix metalloproteinase-10                                      | Proliferation                                                              |
| 28 | MMP11    | Matrix metalloproteinase-11                                      | Proliferation                                                              |
| 29 | MMP13    | (Matrix metalloproteinase-13                                     | Proliferation, odontoblast/osteogenic differentiation                      |
| 30 | MMP14    | Matrix metalloproteinase-14                                      | Proliferation, migration odontoblast/osteogenic differentiation            |
| 31 | MMP15    | Matrix metalloproteinase-15                                      | Proliferation                                                              |
| 32 | MMP16    | Matrix metalloproteinase-16                                      | Proliferation, odontoblast/osteogenic differentiation                      |
| 33 | MMP8     | Matrix metalloproteinase 8                                       | Proliferation, odontoblast/osteogenic differentiation                      |
| 34 | NANOG    | Homeobox protein NANOG                                           | Proliferation, survival                                                    |
| 35 | NRG1     | Pro-neuregulin-1                                                 | Proliferation, migration odontoblast/osteogenic differentiation            |
| 36 | NTF3     | Neurotrophin-3                                                   | Migration, survival                                                        |
| 37 | PROK1    | Prokineticin-1                                                   | Proliferation                                                              |
| 38 | S100A1   | Protein S100-A1                                                  | Angiogenesis                                                               |
| 39 | SELE     | E-selectin                                                       | Migration, inflammation                                                    |
| 40 | SERPINI1 | Neuroserpin                                                      | Neurogenesis                                                               |
| 41 | STAT1    | Signal transducer and activator of transcription 1-alpha/beta    | Inflammation, apoptosis                                                    |
| 42 | STAT5A   | Signal transducer and activator of transcription 5A              | Inflammation                                                               |
| 43 | TGFA     | Protransforming growth factor alpha                              | Proliferation, survival, migration                                         |
| 44 | TGFB1    | Transforming growth factor beta-1                                | Proliferation, survival, migration, odontoblast/osteogenic differentiation |
| 45 | TGFBR2   | Transforming growth factor-beta receptor type-2 receptor type II | Survival, migration, odontoblast/osteogenic differentiation                |
| 46 | TIMP1    | Tissue inhibitor of metalloproteinases 1                         | Proliferation, survival                                                    |

|    |          |                                                                     |                                    |
|----|----------|---------------------------------------------------------------------|------------------------------------|
| 47 | TNFSF13B | Tumor necrosis factor ligand superfamily member 13B                 | Inflammation                       |
| 48 | TNFSF15  | Tumor necrosis factor ligand superfamily member 15 growth inhibitor | Apoptosis                          |
| 49 | TNFSF18  | Tumor necrosis factor ligand superfamily member 18                  | Survival, inflammation             |
| 50 | VEGFB    | Vascular endothelial growth Factor B                                | Proliferation, survival, migration |
